# Supplementary material for: What Is the Impact of Nonrandomness on Random Choice Models?
Source: Atypon-hosted journal article supplement (doi:10.1287/msom.2020.0951), 2021-03-09
Supplement: msom.2020.0951.sm1.pdf [file msom.2020.0951.sm1.pdf]

# What Is the Impact of Non-Randomness on Random Choice Models?

Ruxian Wang

Johns Hopkins University Carey Business School, Baltimore, MD 21202, ruxian.wang@jhu.edu

In this Online Supplement, we provide other technical proofs that are not included in the main text of the paper titled “What Is the Impact of Non-Randomness on Random Choice Models”.

**Proof of Proposition 1.** Let  $u(S) = \mu \log \left( \sum_{k \in S} \exp(u_k/\mu) \right)$ . Then, we have  $q_{i'}(S; u_{i'}) = \Pr \left( \max_{k \in S} U_k \leq u_{i'} \right) = \exp \left( - \exp \left( - \left( (u_{i'} - u(S))/\mu + \gamma \right) \right) \right)$ . We consider its derivatives w.r.t.  $u_{i'}$  as follows:

$$\begin{aligned} \frac{\partial q_{i'}(S; u_{i'})}{\partial u_{i'}} &= 1/\mu \cdot \exp \left( - \exp \left( - \left( (u_{i'} - u(S))/\mu + \gamma \right) \right) \right) \cdot \exp \left( - \left( (u_{i'} - u(S))/\mu + \gamma \right) \right) \geq 0, \\ \frac{\partial^2 q_{i'}(S; u_{i'})}{\partial u_{i'}^2} &= 1/\mu^2 \cdot \exp \left( - \exp \left( - \left( (u_{i'} - u(S))/\mu + \gamma \right) \right) \right) \cdot \exp \left( - \left( (u_{i'} - u(S))/\mu + \gamma \right) \right) \cdot \left( \frac{\sum_{j \in S} a_j}{a_{i'} \exp(\gamma)} - 1 \right). \end{aligned}$$

Therefore,  $q_{i'}(S; u_{i'})$  is concave in  $u_{i'}$  if  $a_{i'} \exp(\gamma) \geq \sum_{j \in S} a_j$  or equivalently  $a_{i'} \geq \exp(-\gamma) \cdot \sum_{j \in S} a_j$ . Note that  $\gamma \approx 0.5772$  is the Euler’s constant, so  $\exp(-\gamma) \approx 0.5615$ . By Jensen’s inequality, immediately we have: if  $a_{i'} \geq 0.5615 \cdot \sum_{j \in S} a_j$ ,

$$q_{i'}(S; u_{i'}) = q_{i'}(S; E[U_{i'}]) \geq E[q_{i'}(S; U_{i'})] = \frac{a_{i'}}{a_{i'} + \sum_{j \in S} a_j}.$$

The last equality holds because of how the MNL model is derived; see, e.g., Theorem 2.2 in Anderson et al. (1992). If  $a_{i'} \leq 0.5615 \cdot \sum_{j \in S} a_j$ , the probability  $q_{i'}(S; u_{i'})$  is convex in  $u_{i'}$ , then we have  $q_{i'}(S; u_{i'}) \leq a_{i'}/(a_{i'} + \sum_{j \in S} a_j)$  also by Jensen’s inequality.

For any other alternative  $i \in S$ , we have the choice probability  $q_i(S; u_{i'}) = a_i / \sum_{j \in S} a_j \cdot [1 - \exp(-\exp(-(u_{i'}/\mu + \gamma)))]$ . Its derivatives w.r.t.  $u_{i'}$  can be derived immediately as follows:

$$\begin{aligned} \frac{\partial q_i(S; u_{i'})}{\partial u_{i'}} &= \frac{-1/\mu \cdot a_i}{\sum_{j \in S} a_j} \cdot \exp \left( - \exp \left( - \left( (u_{i'} - u(S))/\mu + \gamma \right) \right) \right) \cdot \exp \left( - \left( (u_{i'} - u(S))/\mu + \gamma \right) \right) \leq 0, \\ \frac{\partial^2 q_i(S; u_{i'})}{\partial u_{i'}^2} &= \frac{-1/\mu^2 \cdot a_i}{\sum_{j \in S} a_j} \cdot \exp \left( - \exp \left( - \left( (u_{i'} - u(S))/\mu + \gamma \right) \right) \right) \cdot \exp \left( - \left( (u_{i'} - u(S))/\mu + \gamma \right) \right) \cdot \left( \frac{\sum_{j \in S} a_j}{a_{i'} \exp(\gamma)} - 1 \right). \end{aligned}$$

By similar argument, we can establish the comparison for the choice probabilities regarding any product  $i$  in the offer set  $S$ . □

**Proof of Proposition 2.** (a) Note that  $\max(x, y)$  is a convex function in  $x$  for any given  $y$ . Denote  $U(S) := \max_{i \in S} U_i$  and then  $G(S; u_{i'}) = E[\max\{U_i, u_{i'} : i \in S\}] = E[\max\{U(S), u_{i'}\}]$ . By Jensen’s inequality, given any  $U(S)$ , we have

$$E[\max\{U(S), U_{i'}\} | U(S)] \geq \max\{U(S), E[U_{i'}]\},$$

where the first expectation is taken w.r.t.  $U_{i'}$ . Immediately, we have

$$G(S; U_{i'}) = E[E[\max\{U(S), U_{i'}\} | U(S)]] \geq E[\max\{U(S), E[U_{i'}]\}] = E[\max\{U(S), u_{i'}\}] = G(S; u_{i'}),$$

where the first expectation is a conditional expectation.

(b) The density function for  $\max_{i \in S} U_i$  is also a Gumbel random variable and its density is

$$f_{\max}(x) = 1/\mu \cdot \exp \left( - \left( (x - u(S))/\mu + \gamma \right) \right) \cdot \exp \left( - \exp \left( - \left( (x - u(S))/\mu + \gamma \right) \right) \right),$$

where  $u(S) = \mu \log \left( \sum_{k \in S} \exp(u_k/\mu) \right)$ . Then, the perceived consumer surplus with a deterministic utility  $u_{i'}$  can be further expressed by:

$$G(S; u_{i'}) = E \left[ \max_{i \in S} \{U_i, u_{i'}\} \right] = u_{i'} \cdot \exp \left( - \exp \left( - \left( (u_{i'} - u(S))/\mu + \gamma \right) \right) \right) \\ + \int_{u_{i'}}^{\infty} x/\mu \cdot \exp \left( - \left( (x - u(S))/\mu + \gamma \right) \right) \cdot \exp \left( - \exp \left( - \left( (x - u(S))/\mu + \gamma \right) \right) \right) dx.$$

The consumer surplus can be expressed by

$$G(S; u_{i'}) = E \left[ \max \{U(S), u_{i'}\} \right] = u_{i'} \cdot F_{\max}(u_{i'}) + \int_{u_{i'}}^{\infty} x \cdot f_{\max}(x) dx.$$

Then, we have

$$\frac{\partial G(S; u_{i'})}{\partial u_{i'}} = F_{\max}(u_{i'}) = \Pr \left( \max_{i \in S} U_i \leq u_{i'} \right) = \exp \left( - \Lambda \sum_{j \in S} a_j \right) = q_{i'}(S; u_{i'}).$$

To indicate the dependence of consumer surplus on the nominal utility of any product  $i \in S$ , we include the argument  $u(S)$  in the density and distribution function:

$$G(S; u_{i'}) = u_{i'} \cdot \int_{-\infty}^{u_{i'}} f_{\max}(x|u(S)) dx + \int_{u_{i'}}^{\infty} x \cdot f_{\max}(x|u(S)) dx,$$

where  $f_{\max}(x) = 1/\mu \cdot \exp \left( - \left( (x - u(S))/\mu + \gamma \right) \right) \cdot \exp \left( - \exp \left( - \left( (x - u(S))/\mu + \gamma \right) \right) \right)$ . We replace  $x - u(S)$  with  $y$  and derive

$$G(S; u_{i'}) = u_{i'} \cdot \int_{-\infty}^{u_{i'} - u(S)} g(y) dy + \int_{u_{i'} - u(S)}^{\infty} (y + u(S)) \cdot g(y) dy,$$

where  $g(y) = 1/\mu \cdot \exp \left( - \left( (y/\mu + \gamma) \right) \right) \cdot \exp \left( - \exp \left( - \left( (y/\mu + \gamma) \right) \right) \right)$ .

Then, by the chain rule for any product  $i \in S$ ,

$$\frac{\partial G(S; u_{i'})}{\partial u_i} = \frac{\partial}{\partial u(S)} \left( u_{i'} \cdot \int_{-\infty}^{u_{i'} - u(S)} g(y) dy + \int_{u_{i'} - u(S)}^{\infty} (y + u(S)) \cdot g(y) dy \right) \cdot \frac{\partial u(S)}{\partial u_i} \\ = \int_{u_{i'} - u(S)}^{\infty} g(y) dy \cdot \frac{\partial u(S)}{\partial u_i} = \int_{u_{i'}}^{\infty} f_{\max}(x|u(S)) dx \cdot \frac{\partial u(S)}{\partial u_i} \\ = \Pr \left( \max_{i \in S} U_i \geq u_{i'} \right) \cdot \frac{\partial u(S)}{\partial u_i} = \left[ 1 - \exp \left( - \Lambda \sum_{j \in S} a_j \right) \right] \cdot \frac{a_i}{\sum_{j \in S} a_j} = q_i(S; u_{i'}).$$

We have shown  $\partial G(S; u_{i'})/\partial u_i = q_i(S; u_{i'})$  for any  $i \in S'$ .

(c) From part (b), it is obvious to observe that  $G(S; u_{i'})$  is increasing in each  $u_i$  for all  $i \in S'$ . Moreover, we have for any  $i \in S'$

$$\frac{\partial^2 G(S; u_{i'})}{\partial u_i^2} = \frac{\partial q_i(S; u_{i'})}{\partial u_i} \geq 0.$$

The inequality holds because of Proposition 1. Therefore, the consumer surplus is increasing convex in  $u_i$  for all  $i \in S'$ .  $\square$

**Proof of Theorem 4.** By the likelihood functions  $\mathcal{L}(\mathbf{n}, \mathbf{n}_0 | \lambda, \mathbf{v})$  defined in equation (3) in the complete data case and  $\mathcal{L}(\mathbf{n} | \lambda, \mathbf{v})$  defined in equation (7) in the incomplete data case, we have

$$\frac{\mathcal{L}(\mathbf{n}, \mathbf{n}_0 | \lambda, \mathbf{v})}{\mathcal{L}(\mathbf{n} | \lambda, \mathbf{v})} = \frac{\prod_{k=1}^K \frac{\lambda^{n_k + n_{ki'} + n_{k0}} \cdot \exp(-\lambda)}{(n_k + n_{ki'} + n_{k0})!} \cdot \frac{(n_k + n_{ki'} + n_{k0})!}{\prod_{i \in S'_k} n_{ki}!} \cdot \prod_{i \in S'_k} (q_{ki}(\mathbf{v}))^{n_{ki}}}{\prod_{k=1}^K \sum_{n_{k0}=0}^{\infty} \frac{\lambda^{n_k + n_{ki'} + n_{k0}} \cdot \exp(-\lambda)}{(n_k + n_{ki'} + n_{k0})!} \cdot \frac{(n_k + n_{ki'} + n_{k0})!}{n_{k0}! \prod_{i \in S'_k} n_{ki}!} \cdot \prod_{i \in S'_k} (q_{ki}(\mathbf{v}))^{n_{ki}} \cdot (q_{k0}(\mathbf{v}))^{n_{k0}}}$$

$$\begin{aligned}
&= \prod_{k=1}^K \frac{\frac{\lambda^{n_{k0}}}{n_{k0}!} \cdot (q_{k0}(\mathbf{v}))^{n_{k0}}}{\sum_{n_{k0}=0}^{\infty} \frac{\lambda^{n_{k0}}}{n_{k0}!} \cdot (q_{k0}(\mathbf{v}))^{n_{k0}}} = \prod_{k=1}^K \frac{(\lambda \cdot q_{k0}(\mathbf{v}))^{n_{k0}} \cdot \exp(-\lambda \cdot q_{k0}(\mathbf{v}))}{n_{k0}!} \\
&:= \prod_{k=1}^K h(n_{k0}; \lambda \cdot q_{k0}(\mathbf{v})),
\end{aligned}$$

where  $h(n_{k0}; \lambda \cdot q_{k0}(\mathbf{v})) = (\lambda \cdot q_{k0}(\mathbf{v}))^{n_{k0}} \cdot \exp(-\lambda \cdot q_{k0}(\mathbf{v})) / n_{k0}!$  is the probability mass function for the Poisson random variable with mean  $\lambda \cdot q_{k0}(\mathbf{v})$ . The third equality holds because  $\sum_{n_{k0}=0}^{\infty} \lambda^{n_{k0}} \cdot (q_{k0}(\mathbf{v}))^{n_{k0}} / n_{k0}! = \exp(\lambda \cdot q_{k0}(\mathbf{v}))$ .

Immediately, the log-likelihood function  $\mathcal{LL}(\mathbf{n}|\lambda, \mathbf{v}) := \log(\mathcal{L}(\mathbf{n}|\lambda, \mathbf{v}))$  can be expressed as follows

$$\begin{aligned}
\mathcal{LL}(\mathbf{n}|\lambda, \mathbf{v}) &= \log(\mathcal{L}(\mathbf{n}, \mathbf{n}_0|\lambda, \mathbf{v})) - \log\left(\prod_{k=1}^K h(n_{k0}; \lambda \cdot q_{k0}(\mathbf{v}))\right) \\
&= \mathcal{LL}(\mathbf{n}, \mathbf{n}_0|\lambda) + \mathcal{LL}(\mathbf{n}, \mathbf{n}_0|\mathbf{v}) - \sum_{k=1}^K \left[ n_{k0} \cdot \log(\lambda \cdot q_{k0}(\mathbf{v})) - \lambda \cdot q_{k0}(\mathbf{v}) \right] + C', \quad (\text{EC.1})
\end{aligned}$$

where  $C' = -\sum_{k=1}^K \sum_{j \in S'_k} \log(n_{kj}!)$ . Notice that  $\mathcal{LL}(\mathbf{n}, \mathbf{n}_0|\lambda)$  and  $\mathcal{LL}(\mathbf{n}, \mathbf{n}_0|\mathbf{v})$  defined in equations (5) are linear in  $\mathbf{n}_0$  respectively, so  $\mathcal{LL}(\mathbf{n}|\mathbf{v}, \lambda)$  is also linear in  $\mathbf{n}_0$ .

Then, we take expectations for both sides of equation (EC.1) with respect to  $\mathbf{n}_0$  using the probability mass function  $h(n_{k0}; \hat{\lambda}^{(t-1)} \cdot q_{k0}(\hat{\mathbf{v}}^{(t-1)}))$ , where  $\hat{\lambda}^{(t-1)}$  represents the estimated market size in step  $t-1$ , and the choice probability  $q_{k0}(\hat{\mathbf{v}}^{(t-1)})$  corresponds to the estimated parameter  $\hat{\mathbf{v}}^{(t-1)}$  in step  $t-1$ . Therefore, taking expectation for both sides of equation (EC.1) yields

$$\mathcal{LL}(\mathbf{n}|\mathbf{v}, \lambda) = \mathcal{LL}(\mathbf{n}, \hat{\mathbf{n}}_0^{(t)}|\lambda) + \mathcal{LL}(\mathbf{n}, \hat{\mathbf{n}}_0^{(t)}|\mathbf{v}) - \sum_{k=1}^K \left[ \hat{n}_{k0}^{(t)} \cdot \log(\lambda \cdot q_{k0}(\mathbf{v})) - \lambda \cdot q_{k0}(\mathbf{v}) \right] + C', \quad (\text{EC.2})$$

where  $\hat{n}_{k0}^{(t)}$  is the expectation of a Poisson distributed random variable as shown in the E-step (9), i.e.

$$\hat{n}_{k0}^{(t)} = \sum_{n_{k0}=0}^{\infty} h(n_{k0}; \hat{\lambda}^{(t-1)} \cdot q_{k0}(\hat{\mathbf{v}}^{(t-1)})) \cdot n_{k0} = \hat{\lambda}^{(t-1)} \cdot q_{k0}(\hat{\mathbf{v}}^{(t-1)}).$$

In the M-step, we solve the MLE problem for the complete data case with  $\mathbf{n}_0$  replaced by  $\hat{\mathbf{n}}_0^{(t)}$ :

$$\max_{\lambda} \mathcal{LL}(\mathbf{n}, \hat{\mathbf{n}}_0^{(t)}|\lambda) \quad \text{and} \quad \max_{\mathbf{v}} \mathcal{LL}(\mathbf{n}, \hat{\mathbf{n}}_0^{(t)}|\mathbf{v}),$$

and derive the maximizers denoted by  $\hat{\lambda}^{(t)}$  and  $\hat{\mathbf{v}}^{(t)}$ . In fact, we have obtained the closed-form solution for  $\hat{\lambda}^{(t)}$ :  $\hat{\lambda}^{(t)} = \left( \sum_{k=1}^K n_k + n_{ki} + \hat{n}_{k0}^{(t)} \right) / K$ . Obviously, these inequalities hold

$$\mathcal{LL}(\mathbf{n}, \hat{\mathbf{n}}_0^{(t)}|\hat{\lambda}^{(t)}) \geq \mathcal{LL}(\mathbf{n}, \hat{\mathbf{n}}_0^{(t)}|\hat{\lambda}^{(t-1)}) \quad \text{and} \quad \mathcal{LL}(\mathbf{n}, \hat{\mathbf{n}}_0^{(t)}|\hat{\mathbf{v}}^{(t)}) \geq \mathcal{LL}(\mathbf{n}, \hat{\mathbf{n}}_0^{(t)}|\hat{\mathbf{v}}^{(t-1)}). \quad (\text{EC.3})$$

Moreover, at the point  $(\lambda, \mathbf{v}) = (\hat{\lambda}^{(t-1)}, \hat{\mathbf{v}}^{(t-1)})$ , equation (EC.2) can be written by

$$\begin{aligned}
\mathcal{LL}(\mathbf{n}|\hat{\lambda}^{(t-1)}, \hat{\mathbf{v}}^{(t-1)}) &= \mathcal{LL}(\mathbf{n}, \hat{\mathbf{n}}_0^{(t)}|\hat{\lambda}^{(t-1)}) + \mathcal{LL}(\mathbf{n}, \hat{\mathbf{n}}_0^{(t)}|\hat{\mathbf{v}}^{(t-1)}) - \sum_{k=1}^K \left[ \hat{\lambda}^{(t-1)} \cdot q_{k0}(\hat{\mathbf{v}}^{(t-1)}) \cdot \log(\hat{\lambda}^{(t-1)} \cdot q_{k0}(\hat{\mathbf{v}}^{(t-1)})) \right. \\
&\quad \left. - \hat{\lambda}^{(t-1)} \cdot q_{k0}(\hat{\mathbf{v}}^{(t-1)}) \right];
\end{aligned}$$

while at the point  $(\lambda, \mathbf{v}) = (\hat{\lambda}^{(t)}, \hat{\mathbf{v}}^{(t)})$ , equation (EC.2) can be written by

$$\mathcal{LL}(\mathbf{n}|\hat{\lambda}^{(t)}, \hat{\mathbf{v}}^{(t)}) = \mathcal{LL}(\mathbf{n}, \hat{\mathbf{n}}_0^{(t)}|\hat{\lambda}^{(t)}) + \mathcal{LL}(\mathbf{n}, \hat{\mathbf{n}}_0^{(t)}|\hat{\mathbf{v}}^{(t)}) - \sum_{k=1}^K \left[ \hat{\lambda}^{(t-1)} \cdot q_{k0}(\hat{\mathbf{v}}^{(t-1)}) \cdot \log(\hat{\lambda}^{(t)} \cdot q_{k0}(\hat{\mathbf{v}}^{(t)})) - \hat{\lambda}^{(t)} \cdot q_{k0}(\hat{\mathbf{v}}^{(t)}) \right].$$

The constant term  $C'$  is omitted in the above two equations for  $\mathcal{LL}(\mathbf{n}|\hat{\lambda}^{(t-1)}, \hat{\mathbf{v}}^{(t-1)})$  and  $\mathcal{LL}(\mathbf{n}|\hat{\lambda}^{(t)}, \hat{\mathbf{v}}^{(t)})$ .

Given any  $y$ , consider the function  $F(x) := y \cdot \log(x) - x$ . We obtain its derivatives:

$$F'(x) = \frac{y}{x} - 1 \text{ and } F''(x) = -\frac{y}{x^2} < 0.$$

One can see  $F(x)$  is concave in  $x$  and  $\max_x F(x) = F(y)$ . Immediately, we have

$$\begin{aligned} & \widehat{\lambda}^{(t-1)} \cdot q_{k0}(\widehat{\mathbf{v}}^{(t-1)}) \cdot \log(\widehat{\lambda}^{(t-1)} \cdot q_{k0}(\widehat{\mathbf{v}}^{(t-1)})) - \widehat{\lambda}^{(t-1)} \cdot q_{k0}(\widehat{\mathbf{v}}^{(t-1)}) \\ & \geq \widehat{\lambda}^{(t-1)} \cdot q_{k0}(\widehat{\mathbf{v}}^{(t-1)}) \cdot \log(\widehat{\lambda}^{(t)} \cdot q_{k0}(\widehat{\mathbf{v}}^{(t)})) - \widehat{\lambda}^{(t)} \cdot q_{k0}(\widehat{\mathbf{v}}^{(t)}). \end{aligned} \quad (\text{EC.4})$$

Combining inequalities (EC.3) and (EC.4) yields

$$\mathcal{LL}(\mathbf{n}|\widehat{\lambda}^{(t)}, \widehat{\mathbf{v}}^{(t)}) \geq \mathcal{LL}(\mathbf{n}|\widehat{\lambda}^{(t-1)}, \widehat{\mathbf{v}}^{(t-1)}). \quad (\text{EC.5})$$

Therefore, the log-likelihood function  $\mathcal{LL}(\mathbf{n}|\widehat{\lambda}^{(t)}, \widehat{\mathbf{v}}^{(t)})$  increases in  $t$  and is bounded above, so it must converge as  $t \rightarrow \infty$ .  $\square$

**Proof of Theorem 7.** Set  $\Lambda = 1$  for notational convenience and also without loss of generality. By  $q_0 = \exp(-\sum_{j \in S} a_j)$ , we have  $\sum_{j \in S} a_j = -\log(q_0)$  and therefore for any  $i \in S$

$$q_i(q_0) = \frac{a_i(1 - q_0)}{-\log(q_0)}.$$

First, we show  $q_i(q_0) \geq a_i q_0$  for any  $0 < q_0 < 1$ . Consider

$$\frac{\partial(q_i(q_0)/q_0)}{\partial q_0} = \frac{\partial}{\partial q_0} \frac{a_i(1 - q_0)}{-q_0 \log(q_0)} = a_i \cdot \frac{\log(q_0) - q_0 + 1}{(q_0 \log(q_0))^2} < 0, \quad \forall 0 < q_0 < 1. \quad (\text{EC.6})$$

The inequality holds because  $\partial(\log(q_0) - q_0 + 1)/\partial q_0 = 1/q_0 - 1 > 0$  and  $(\log(q_0) - q_0 + 1)|_{q_0=1} = 0$ . Then,  $q_i(q_0)/q_0$  is decreasing in  $q_0$ . Moreover,  $\lim_{q_0 \rightarrow 1} q_i(q_0)/q_0 = \lim_{q_0 \rightarrow 1} a_i(1 - q_0)/(-q_0 \log(q_0)) = a_i$ . Therefore, we have  $q_i(q_0) \geq a_i q_0$  for any  $0 < q_0 < 1$ .

Recall  $q_0^* \geq \tau$ , so for any  $i \in S^*$

$$q_i^* \leq q_0^* \cdot \frac{a_i(1 - \tau)}{-\tau \log(\tau)}. \quad (\text{EC.7})$$

Suppose that all the products including product  $i'$  are labelled in the revenue-decreasing order. We will show that there exist two consecutive revenue-ordered assortments, denoted by  $S_{k-1}$  and  $S_k$ , such that  $\gamma R(S_{k-1}) + (1 - \gamma)R(S_k) \geq \frac{-\tau \log(\tau)}{1 - \tau} \cdot R(S^*)$ , where  $S_k := \{1, 2, \dots, k\}$  and  $0 \leq \gamma \leq 1$ .

For any offer set  $S$ , let  $Q(S)$  be the sum of the choice probabilities for all items in set  $S$ , excluding the no-purchase option, i.e.,  $Q(S) = \sum_{j \in S} q_j(S) = 1 - \exp(-\Lambda \sum_{j \in S} a_j)$ . We observe that  $Q(S)$  is larger if the offer set  $S$  is larger. Then, for any set  $S$ , there exists  $k$  such that  $Q(S_{k-1}) < Q(S^*) \leq Q(S_k)$ . For such  $k$ , let  $0 \leq \gamma \leq 1$  be the coefficient such that  $\gamma Q(S_{k-1}) + (1 - \gamma)Q(S_k) = Q(S^*)$ . Immediately, we have  $\gamma q_0(S_{k-1}) + (1 - \gamma)q_0(S_k) = q_0(S^*)$ . Next, it holds that for each  $j < k$ ,

$$\begin{aligned} & \gamma q_j(S_{k-1}) + (1 - \gamma)q_j(S_k) = \gamma q_j(q_0(S_{k-1})) + (1 - \gamma)q_j(q_0(S_k)) \\ & \geq \gamma a_j q_0(S_{k-1}) + (1 - \gamma)a_j q_0(S_k) = a_j q_0(S^*) \geq \frac{-\tau \log(\tau)}{1 - \tau} \cdot q_j(S^*). \end{aligned}$$

The first inequality holds because  $q_j(q_0) \geq a_j q_0$ ; the second inequality holds because of the inequality (EC.7). Note that  $q_j(S^*) = 0$  for any  $j \notin S^*$ . Then,

$$\frac{1 - \tau}{-\tau \log(\tau)} (\gamma q_j(S_{k-1}) + (1 - \gamma)q_j(S_k)) - q_j(S^*) \geq 0.$$

Moreover, by similar argument for (EC.6), we can show  $\frac{1-\tau}{-\tau \log(\tau)} > 1$  for any  $0 < \tau < 1$ . Therefore, we have the following comparison:

$$\begin{aligned}
& \frac{1-\tau}{-\tau \log(\tau)} \cdot \left[ \gamma R(S_{k-1}) + (1-\gamma)R(S_k) \right] - R(S^*) \\
&= \sum_{j=1}^{k-1} p_j \cdot \left[ \frac{1-\tau}{-\tau \log(\tau)} (\gamma q_j(S_{k-1}) + (1-\gamma)q_j(S_k)) - q_j(S^*) \right] + \frac{1-\tau}{-\tau \log(\tau)} \cdot (1-\gamma)p_k \cdot q_k(S_k) - \sum_{j \geq k, j \in S^*} p_j \cdot q_j(S^*) \\
&\geq p_k \cdot \sum_{j=1}^{k-1} \left[ \frac{1-\tau}{-\tau \log(\tau)} (\gamma q_j(S_{k-1}) + (1-\gamma)q_j(S_k)) - q_j(S^*) \right] + \frac{1-\tau}{-\tau \log(\tau)} \cdot (1-\gamma)p_k \cdot q_k(S_k) - \sum_{j \geq k, j \in S^*} p_j \cdot q_j(S^*) \\
&\geq p_k \cdot \left( \sum_{j=1}^{k-1} \gamma q_j(S_{k-1}) + (1-\gamma)q_j(S_k) - q_j(S^*) \right) + (1-\gamma)p_k \cdot q_k(S_k) - p_k \cdot \sum_{j \geq k, j \in S^*} q_j(S^*) \\
&= p_k \cdot \left( \gamma \sum_{j \in S_{k-1}} q_j(S_{k-1}) + (1-\gamma) \sum_{j \in S_k} q_j(S_k) - \sum_{j \in S^*} q_j(S^*) \right) = p_k \cdot \left( \gamma Q(S_{k-1}) + (1-\gamma)Q(S_k) - Q(S^*) \right) = 0.
\end{aligned}$$

Thus, for the optimal assortment  $S^*$ , there exist two revenue-ordered assortments  $S_{k-1}$  and  $S_k$  such that

$$\text{either } \frac{1-\tau}{-\tau \log(\tau)} \cdot R(S_{k-1}) \geq R(S^*) \quad \text{or} \quad \frac{1-\tau}{-\tau \log(\tau)} \cdot R(S_k) \geq R(S^*).$$

Finally, we have established the performance guarantee for the revenue-ordered assortments.  $\square$

**Proof of Proposition 3.** Without loss of generality, assume  $\alpha_0 = 0$  for the no-purchase option and then  $\alpha_0 = \exp(\alpha_0) = 1$  for notational brevity in this proof. We consider the first-order condition for the aggregate revenue w.r.t.  $p_k$ :

$$\begin{aligned}
& \frac{\beta_k \cdot \exp(\alpha_k - \beta_k p_k)}{\sum_{j \in S^+} \exp(\alpha_j - \beta_j p_j)} \cdot \left( \sum_{i \in S} \frac{p_i \cdot \exp(\alpha_i - \beta_i p_i)}{\sum_{j \in S^+} \exp(\alpha_j - \beta_j p_j)} + 1/\beta_k - p_k \right) \cdot \left[ 1 - \exp\left(-\Lambda \sum_{j \in S^+} \exp(\alpha_j - \beta_j p_j)\right) \right] \\
&+ \left( p_{i'} - \sum_{i \in S} \frac{p_i \cdot \exp(\alpha_i - \beta_i p_i)}{\sum_{j \in S^+} \exp(\alpha_j - \beta_j p_j)} \right) \cdot \exp\left(-\Lambda \sum_{j \in S^+} \exp(\alpha_j - \beta_j p_j)\right) \cdot \beta_k \Lambda \exp(\alpha_k - \beta_k p_k) = 0.
\end{aligned}$$

It is straightforward to see that  $p_k < \infty$  at optimality, so we have

$$\begin{aligned}
& \left( \sum_{i \in S} \frac{p_i \cdot \exp(\alpha_i - \beta_i p_i)}{\sum_{j \in S^+} \exp(\alpha_j - \beta_j p_j)} + \frac{1}{\beta_k} - p_k \right) \cdot \frac{1 - \exp\left(-\Lambda \sum_{j \in S^+} \exp(\alpha_j - \beta_j p_j)\right)}{\sum_{j \in S^+} \exp(\alpha_j - \beta_j p_j)} \\
&+ \left( p_{i'} - \sum_{i \in S} \frac{p_i \cdot \exp(\alpha_i - \beta_i p_i)}{\sum_{j \in S^+} \exp(\alpha_j - \beta_j p_j)} \right) \cdot \exp\left(-\Lambda \sum_{j \in S^+} \exp(\alpha_j - \beta_j p_j)\right) \cdot \Lambda = 0.
\end{aligned}$$

We observe that the above equality holds at optimality for any  $k \in S$ , so  $(p_k - 1/\beta_k)$  is the same at optimality for any  $k \in S$ , denoted it by  $p$ .

Then,  $p_k = p + 1/\beta_k$  for any  $k \in S$ , and the problem (15) can be rewritten by

$$\begin{aligned}
\max_{p, p_{i'}} R(p, p_{i'}) &:= \sum_{i \in S} \frac{(p + 1/\beta_i) \cdot \exp(\alpha_i - 1 - \beta_i p)}{1 + \sum_{j \in S} \exp(\alpha_j - 1 - \beta_j p)} \cdot \left[ 1 - \exp\left(-\left(1 + \sum_{j \in S} \exp(\alpha_j - 1 - \beta_j p)\right)\right) \right. \\
&\quad \left. \cdot \exp(-\alpha_{i'} + \beta_{i'} p_{i'} - \gamma) \right] + p_{i'} \cdot \exp\left(-\left(1 + \sum_{j \in S} \exp(\alpha_j - 1 - \beta_j p)\right) \cdot \exp(-\alpha_{i'} + \beta_{i'} p_{i'} - \gamma)\right).
\end{aligned}$$

We consider the first-order condition for  $R(p, p_{i'})$  w.r.t.  $p_{i'}$ :

$$\frac{\partial R(p, p_{i'})}{\partial p_{i'}} = \exp\left(-\left(1 + \sum_{j \in S} \exp(\alpha_j - 1 - \beta_j p)\right) \cdot \exp(-\alpha_{i'} + \beta_{i'} p_{i'} - \gamma)\right) \cdot \left[ 1 - \beta_{i'} (p_{i'}) \right]$$

$$-\sum_{i \in S} \left( \frac{(p+1/\beta_i) \cdot \exp(\alpha_i - 1 - \beta_i p)}{1 + \sum_{j \in S} \exp(\alpha_j - 1 - \beta_j p)} \right) \cdot \left( 1 + \sum_{j \in S} \exp(\alpha_j - 1 - \beta_j p) \right) \cdot \exp(-\alpha_{i'} + \beta_{i'} p_{i'} - \gamma) \Big] = 0.$$

Then, we have

$$\left( p_{i'} - \sum_{i \in S} \frac{(p+1/\beta_i) \cdot \exp(\alpha_i - 1 - \beta_i p)}{1 + \sum_{j \in S} \exp(\alpha_j - 1 - \beta_j p)} \right) \cdot \left( 1 + \sum_{j \in S} \exp(\alpha_j - 1 - \beta_j p) \right) \cdot \exp(-\alpha_{i'} + \beta_{i'} p_{i'} - \gamma) = \frac{1}{\beta_{i'}}.$$

Note that for any given  $p$ , it must hold  $p_{i'} - \sum_{i \in S} \frac{(p+1/\beta_i) \cdot \exp(\alpha_i - 1 - \beta_i p)}{1 + \sum_{j \in S} \exp(\alpha_j - 1 - \beta_j p)} > 0$ . The LHS of the above equation is increasing in  $p_{i'}$ , so for any given  $p$ , there exists a unique  $p_{i'}$  corresponding to the above equation.  $\square$

**Proof of Theorem 8.** We consider its log-derivatives as follows: for any  $i \in S$ ,

$$\frac{\partial \log(R_i(\mathbf{p}))}{\partial p_i} = \frac{1}{p_i} - \beta_i + \frac{\beta_i \exp(\alpha_i - \beta_i p_i)}{\sum_{j \in S^+} \exp(\alpha_j - \beta_j p_j)} - \frac{\exp(-\Lambda \sum_{j \in S^+} \exp(\alpha_j - \beta_j p_j)) \cdot \beta_i \Lambda \exp(\alpha_i - \beta_i p_i)}{1 - \exp(-\Lambda \sum_{j \in S^+} \exp(\alpha_j - \beta_j p_j))}.$$

For any  $i, k \in S, i \neq k$ , we have the cross-derivative:

$$\begin{aligned} \frac{\partial^2 \log(R_i(\mathbf{p}))}{\partial p_i \partial p_k} &= \frac{\beta_i \exp(\alpha_i - p_i)}{\sum_{j \in S^+} \exp(\alpha_j - p_j)} \cdot \frac{\beta_k \exp(\alpha_k - p_k)}{\sum_{j \in S^+} \exp(\alpha_j - p_j)} \\ &\quad - \frac{\exp(-\Lambda \sum_{j \in S^+} \exp(\alpha_j - \beta_j p_j))}{(1 - \exp(-\Lambda \sum_{j \in S^+} \exp(\alpha_j - \beta_j p_j)))^2} \cdot \Lambda^2 \beta_i \exp(\alpha_i - \beta_i p_i) \cdot \beta_k \exp(\alpha_k - \beta_k p_k) \\ &= \Lambda^2 \beta_i \beta_k \cdot \exp(\alpha_i - p_i) \exp(\alpha_k - p_k) \cdot \left( \frac{1}{x^2} - \frac{1}{\exp(x) + \exp(-x) - 2} \right) \geq 0, \end{aligned}$$

where  $x = \Lambda \sum_{j \in S^+} \exp(\alpha_j - \beta_j p_j)$ . The inequality holds because for any  $x \geq 0$  we have  $x^2 \leq \exp(x) + \exp(-x) - 2$  as follows:

$$\begin{aligned} \left. \frac{\partial(\exp(x) + \exp(-x) - 2 - x^2)}{\partial x} \right|_{x=0} &= (\exp(x) - \exp(-x) - 2x)|_{x=0} = 0, \\ \frac{\partial^2(\exp(x) + \exp(-x) - 2 - x^2)}{\partial x^2} &= \exp(x) + \exp(-x) - 2 \geq 0, \quad \forall x. \end{aligned}$$

Then,  $(\exp(x) + \exp(-x) - 2 - x^2)$  is convex in  $x$ , and therefore  $\partial(\exp(x) + \exp(-x) - 2 - x^2)/\partial x$  is increasing in  $x$ . Thus,  $\partial(\exp(x) + \exp(-x) - 2 - x^2)/\partial x \geq 0$  for any  $x \geq 0$ , i.e.,  $(\exp(x) + \exp(-x) - 2 - x^2)$  is increasing in  $x$ . Moreover,  $(\exp(x) + \exp(-x) - 2 - x^2)|_{x=0} = 0$ , so  $x^2 \leq \exp(x) + \exp(-x) - 2$  for any  $x \geq 0$ .

Recall  $\Lambda = \exp(-\alpha_{i'} + \beta_{i'} p_{i'} - \gamma)$ . Then,  $\partial \log(R_i(\mathbf{p}))/\partial p_i$  can be rewritten explicitly in  $p_{i'}$ :

$$\frac{\partial \log(R_i(\mathbf{p}))}{\partial p_i} = \frac{1}{p_i} - \beta_i + \frac{\beta_i \exp(\alpha_i - \beta_i p_i)}{\sum_{j \in S^+} \exp(\alpha_j - \beta_j p_j)} - \frac{\exp(-\sum_{j \in S^+} \exp(\hat{\alpha}_j - \beta_j p_j + \beta_{i'} p_{i'})) \cdot \beta_i \exp(\hat{\alpha}_i - \beta_i p_i + \beta_{i'} p_{i'})}{1 - \exp(-\sum_{j \in S^+} \exp(\hat{\alpha}_j - \beta_j p_j + \beta_{i'} p_{i'}))}.$$

where  $\hat{\alpha}_j = \alpha_j - \alpha_{j'} - \gamma$  for any  $j \in S^+$ . For any  $i \in S$  and  $i'$ , we have the cross-derivative:

$$\begin{aligned} \frac{\partial^2 \log(R_i(\mathbf{p}))}{\partial p_i \partial p_{i'}} &= -\frac{\exp(-y) \cdot \beta_i \beta_{i'} \exp(\hat{\alpha}_i - \beta_i p_i + \beta_{i'} p_{i'})}{1 - \exp(-y)} + \frac{\exp(-y) \beta_i \beta_{i'} \exp(\hat{\alpha}_i - \beta_i p_i + p_{i'}) \cdot y}{(1 - \exp(-y))^2} \\ &= \frac{\exp(-y) \cdot \beta_i \beta_{i'} \exp(\hat{\alpha}_i - \beta_i p_i + \beta_{i'} p_{i'})}{(1 - \exp(-y))^2} \cdot (-1 + \exp(-y) + y) \geq 0. \end{aligned}$$

where  $y = \sum_{j \in S^+} \exp(\hat{\alpha}_j - \beta_j p_j + \beta_{i'} p_{i'})$ . The inequality holds because  $-1 + \exp(-y) + y \geq 0$  for any  $y \geq 0$ . To see this inequality, consider  $\partial(-1 + \exp(-y) + y)/\partial y = 1 - \exp(-y) \geq 0$  and  $(-1 + \exp(-y) + y)|_{y=0} = 0$ . Therefore, for any  $i \in S$ , the payoff function  $R_i(\mathbf{p})$  is log-supermodular.

Firm  $i'$ 's pay-off function (17) can be rewritten by

$$R_{i'}(\mathbf{p}) := p_{i'} \cdot \exp\left(-\sum_{j \in S^+} \exp(\hat{\alpha}_j - \beta_j p_j + \beta_{i'} p_{i'})\right).$$

Then, we derive its log-derivatives as follows:

$$\frac{\partial \log(R_{i'}(\mathbf{p}))}{\partial p_{i'}} = \frac{1}{p_{i'}} - \sum_{j \in S^+} \beta_{i'} \exp(\hat{\alpha}_j - \beta_j p_j + \beta_{i'} p_{i'}) \quad \text{and} \quad \frac{\partial^2 \log(R_{i'}(\mathbf{p}))}{\partial p_{i'} \partial p_i} = \beta_{i'} \beta_i \exp(\hat{\alpha}_j - \beta_j p_j + \beta_{i'} p_{i'}) \geq 0.$$

Thus, we have shown that the price competition is log-supermodular and therefore there exists a Nash equilibrium; see Vives (2001).  $\square$

**Proof of Proposition 4.** We set  $u_0 = -\gamma$  and then have  $\Lambda = \exp(-u_0 - \gamma) = 1$  without loss of generality. We consider the first-order condition for  $R(\mathbf{p})$  w.r.t.  $p_k$ :

$$\frac{\partial R(\mathbf{p})}{\partial p_k} = \frac{\beta_k \exp(\alpha_k - \beta p_k)}{A} \cdot \left[ (1/\beta_k - p_k) \cdot (1 - \exp(-A)) - \sum_{i \in S} p_i \cdot \exp(\alpha_i - \beta_i p_i) \cdot \frac{\exp(-A)(A+1) - 1}{A} \right] = 0,$$

where  $A = \sum_{j \in S} \exp(\alpha_j - \beta_j p_j)$  for notational convenience. Then, we have

$$(1/\beta_k - p_k) \cdot (1 - \exp(-A)) = \sum_{i \in S} p_i \cdot \exp(\alpha_i - \beta_i p_i) \cdot \frac{\exp(-A)(A+1) - 1}{A}.$$

The RHS is independent of  $p_k$ , so  $(p_k - 1/\beta_k)$  is the same for any product  $k \in S$ , denoted by  $p$ . Then,  $p_k = p + 1/\beta_k$  for any  $k \in S$ , and the total revenue  $R(\mathbf{p})$  can be rewritten by

$$R(p) := \sum_{i \in S} \frac{(p + 1/\beta_i) \cdot \exp(\alpha_i - 1 - \beta_i p)}{\sum_{j \in S} \exp(\alpha_j - 1 - \beta_j p)} \cdot \left[ 1 - \exp\left(-\sum_{j \in S} \exp(\alpha_j - 1 - \beta_j p)\right) \right].$$

We consider the first-order condition as follows:

$$\frac{\partial R(p)}{\partial p} = -\exp(-B) \cdot \sum_{j \in S} \beta_j \exp(\alpha_j - 1 - \beta_j p) \cdot G(p) = 0.$$

where  $G(p)$  is given by

$$G(p) = \sum_{j \in S} \frac{\exp(\alpha_j - 1 - \beta_j p)}{\beta_j} \cdot \frac{1 + B - \exp(B)}{B^2} + p \quad \text{and} \quad B = \sum_{j \in S} \exp(\alpha_j - 1 - \beta_j p).$$

To show the unimodality of  $R(p)$ , it is sufficient to show  $G(p) = 0$  has a unique solution. To do so, consider

$$\frac{\partial G(p)}{\partial p} = -\frac{1}{B} + \frac{\exp(B)}{B} + \frac{1}{B^3} (2 + B - 2\exp(B) + B\exp(B)) \cdot \sum_{j \in S} \frac{\exp(\alpha_j - 1 - \beta_j p)}{\beta_j} \cdot \sum_{j \in S} \beta_j \exp(\alpha_j - 1 - \beta_j p).$$

We observe  $\partial(2 + B - 2\exp(B) + B\exp(B))/\partial B = 1 - \exp(B) + B\exp(B) \geq 0$  for any  $B \geq 0$  because  $\partial(1 - \exp(B) + B\exp(B))/\partial B = B\exp(B) \geq 0$  for any  $B \geq 0$  and  $(1 - \exp(B) + B\exp(B))|_{B=0} = 0$ . Notice  $(2 + B - 2\exp(B) + B\exp(B))|_{B=0} = 0$ , so  $2 + B - 2\exp(B) + B\exp(B) \geq 0$  for any  $B \geq 0$ . By the Cauchy-Schwarz inequality, we have

$$\sum_{j \in S} 1/\beta_j \cdot \exp(\alpha_j - 1 - \beta_j p) \cdot \sum_{j \in S} \beta_j \cdot \exp(\alpha_j - 1 - \beta_j p) \geq B^2,$$

where again  $B = \sum_{j \in S} \exp(\alpha_j - 1 - \beta_j p)$ . Therefore, we have

$$\frac{\partial G(p)}{\partial p} \geq -\frac{1}{B} + \frac{\exp(B)}{B} + \frac{1}{B^3} (2 + B - 2\exp(B) + B\exp(B)) \cdot B^2 = 1 + \frac{1}{B} + \exp(B) - \frac{\exp(B)}{B}.$$

We observe that

$$\frac{\partial(1 + 1/B + \exp(B) - \exp(B)/B)}{\partial B} = \frac{1}{B^2} \cdot (-1 + (1 - B + B^2) \cdot \exp(B)) \geq 0, \quad \forall B \geq 0,$$

because  $\partial(-1 + (1 - B + B^2) \cdot \exp(B))/\partial B = (B + B^2) \exp(B) \geq 0$  for any  $B \geq 0$  and  $(-1 + (1 - B + B^2) \cdot \exp(B))|_{B=0} = 0$ . Moreover,

$$\lim_{B \rightarrow 0} \left( 1 + \frac{1}{B} + \exp(B) - \frac{\exp(B)}{B} \right) = \lim_{B \rightarrow 0} (1 + \exp(B)) + \lim_{B \rightarrow 0} \frac{1 - \exp(B)}{B} = 1.$$

Thus, for any  $p$  we have

$$\frac{\partial G(p)}{\partial p} \geq 1 + \frac{1}{B} + \exp(B) - \frac{\exp(B)}{B} \geq 1 > 0,$$

so  $G(p)$  is increasing in  $p$ . We also observe  $G(0) < 0$  because  $1 + B - \exp(B) < 0$  for any  $B > 0$ , and  $\lim_{p \rightarrow \infty} G(p) = \infty$ . Therefore, there exists a unique solution to  $G(p) = 0$  and then  $R(p)$  is unimodal in  $p$ .  $\square$

**Proof of Theorem 9.** For the payoff function:

$$R_i(\mathbf{p}) = \frac{p_i \cdot \exp(\alpha_i - \beta_i p_i)}{\sum_{j \in S} \exp(\alpha_j - \beta_j p_j)} \cdot \left[ 1 - \exp\left(-\Lambda \sum_{j \in S} \exp(\alpha_j - \beta_j p_j)\right) \right],$$

we consider its log-derivatives as follows:

$$\begin{aligned} \frac{\partial \log(R_i(\mathbf{p}))}{\partial p_i} &= \frac{1}{p_i} - \beta_i + \frac{\beta_i \exp(\alpha_i - \beta_i p_i)}{\sum_{j \in S} \exp(\alpha_j - \beta_j p_j)} - \frac{\exp\left(-\Lambda \sum_{j \in S} \exp(\alpha_j - \beta_j p_j)\right) \cdot \Lambda \beta_i \exp(\alpha_i - \beta_i p_i)}{1 - \exp\left(-\Lambda \sum_{j \in S} \exp(\alpha_j - \beta_j p_j)\right)}, \\ \frac{\partial^2 \log(R_i(\mathbf{p}))}{\partial p_i \partial p_k} &= \frac{\beta_i \exp(\alpha_i - \beta_i p_i)}{\sum_{j \in S} \exp(\alpha_j - \beta_j p_j)} \cdot \frac{\beta_k \exp(\alpha_k - \beta_k p_k)}{\sum_{j \in S} \exp(\alpha_j - \beta_j p_j)} \\ &\quad - \frac{\exp\left(-\Lambda \sum_{j \in S} \exp(\alpha_j - \beta_j p_j)\right)}{\left(1 - \exp\left(-\Lambda \sum_{j \in S} \exp(\alpha_j - \beta_j p_j)\right)\right)^2} \cdot \Lambda^2 \beta_i \beta_k \exp(\alpha_i - \beta_i p_i) \exp(\alpha_k - \beta_k p_k) \\ &= \Lambda^2 \beta_i \beta_k \exp(\alpha_i - \beta_i p_i) \exp(\alpha_k - \beta_k p_k) \cdot \left( \frac{1}{x^2} - \frac{1}{\exp(x) + \exp(-x) - 2} \right), \end{aligned}$$

where  $x = \Lambda \sum_{j \in S} \exp(\alpha_j - \beta_j p_j)$ . To show  $R_i(\mathbf{p})$  is log-supermodular, it is sufficient to show  $x^2 \leq \exp(x) + \exp(-x) - 2$  for any  $x \geq 0$ .

We consider

$$\begin{aligned} \left. \frac{\partial(\exp(x) + \exp(-x) - 2 - x^2)}{\partial x} \right|_{x=0} &= (\exp(x) - \exp(-x) - 2x)|_{x=0} = 0, \\ \frac{\partial^2(\exp(x) + \exp(-x) - 2 - x^2)}{\partial x^2} &= \exp(x) + \exp(-x) - 2 \geq 0, \quad \forall x. \end{aligned}$$

Then,  $(\exp(x) + \exp(-x) - 2 - x^2)$  is convex in  $x$ , and therefore  $\partial(\exp(x) + \exp(-x) - 2 - x^2)/\partial x$  is increasing in  $x$ . Thus,  $\partial(\exp(x) + \exp(-x) - 2 - x^2)/\partial x \geq 0$  for any  $x \geq 0$ , i.e.,  $(\exp(x) + \exp(-x) - 2 - x^2)$  is increasing in  $x$ . Moreover,  $(\exp(x) + \exp(-x) - 2 - x^2)|_{x=0} = 0$ , so  $x^2 \leq \exp(x) + \exp(-x) - 2$  for any  $x \geq 0$ . Finally, we have shown the price competition is log-supermodular and therefore there exists a Nash equilibrium. Moreover, we can also establish its uniqueness by considering diagonal dominance.  $\square$

**Proof of Proposition 5.** By the proof of Theorem 10,  $\max_{j \in S_i}(u_{ij} + \xi_{ij})$  is another Gumbel random variable with the scale parameter  $\mu_2$  and mean  $u(S_i) := \mu_2 \log\left(\sum_{j \in S_i} \exp(u_{ij}/\mu_2)\right)$ . We define  $U(S_i) := \max_{j \in S_i} U_{ij} = \max_{j \in S_i}(u_{ij} + \xi_{ij}) + \xi_i$ . Then, the  $U(S_i)$ 's are independent Gumbel random variables with the same scale parameter  $\mu_1$  for all  $i = 1, 2, \dots, m$ , and  $E[U(S_i)] = u(S_i)$ .

Therefore, we have

$$\begin{aligned} q_{ij}(\mathbf{S}; u_0) &= \Pr(U(S_i) \geq U(S_j), \forall j \neq i, U(S_i) \geq u_0) \cdot \Pr(U_{ij} \geq U_{ik}, \forall k \neq j) \\ &= \frac{\exp(u(S_i)/\mu_1)}{\sum_{i=1}^m \exp(u(S_i)/\mu_1)} \cdot \left[ 1 - \exp\left(-\Lambda \sum_{i=1}^m \exp(u(S_i)/\mu_1)\right) \right] \cdot \Pr(u_{ij} + \xi_{ij} \geq u_{ik} + \xi_{ik}, \forall k \neq j) \\ &= \frac{\exp(u(S_i)/\mu_1)}{\sum_{i=1}^m \exp(u(S_i)/\mu_1)} \cdot \left[ 1 - \exp\left(-\Lambda \sum_{i=1}^m \exp(u(S_i)/\mu_1)\right) \right] \cdot \frac{\exp(u_{ij}/\mu_2)}{\sum_{k \in S_i} \exp(u_{ik}/\mu_2)}. \end{aligned}$$

The second equality holds because of Theorem 1; the third equality holds because of the MNL model.  $\square$
